# Supplementary material for: Flux growth of Sr2Ta2O7 crystals and subsequent nitridation to form SrTaO2N crystals
Source: Royal Society of Chemistry journal article supplement (doi:10.1039/c3ce41315b), 2013-01-01
Supplement: c3ce41315b.pdf [file c3ce41315b.pdf]

## Electronic Supplementary Information (ESI) data

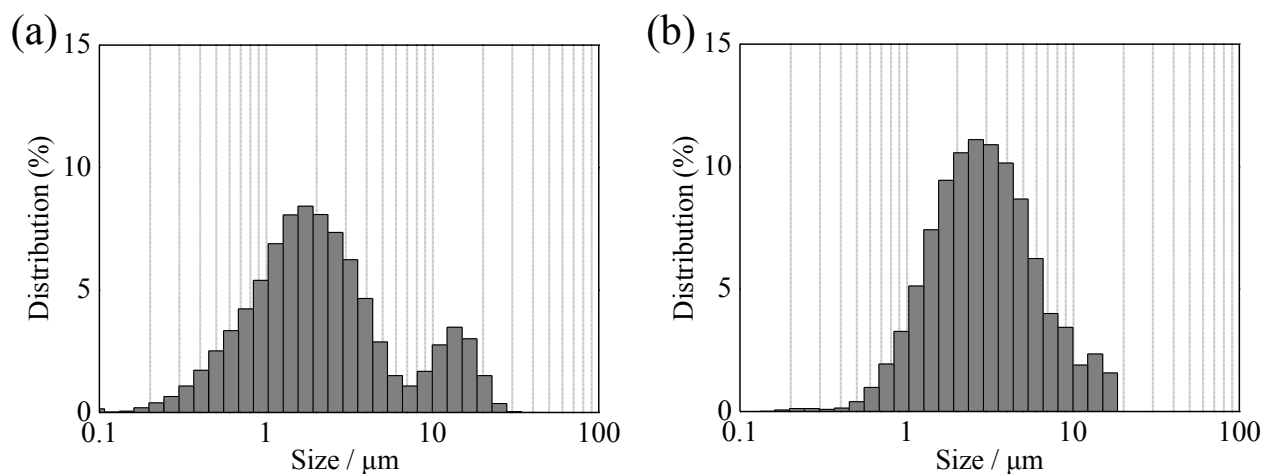

Supplementary Information 1 Particle size distributions of the (a)  $\text{Sr}_2\text{Ta}_2\text{O}_7$  and (b)  $\text{SrTaO}_2\text{N}$  crystals.

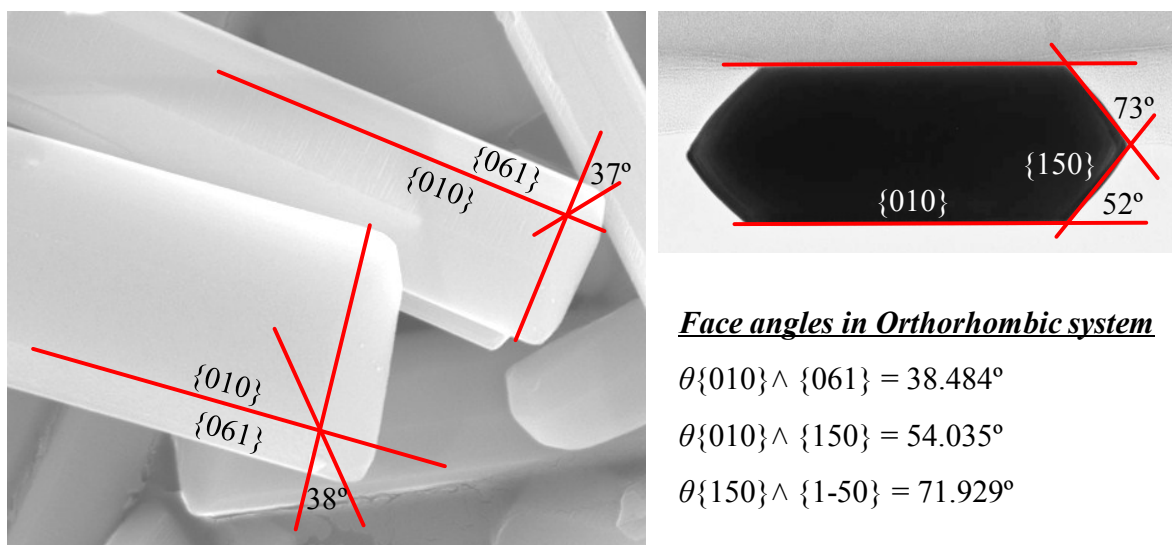

### ***Face angles in Orthorhombic system***

$$\theta\{010\} \wedge \{061\} = 38.484^\circ$$

$$\theta\{010\} \wedge \{150\} = 54.035^\circ$$

$$\theta\{150\} \wedge \{1-50\} = 71.929^\circ$$

Supplementary Information 2 Face-angle measurements of the  $\text{Sr}_2\text{Ta}_2\text{O}_7$  columnar structures.
